# Supplementary material for: Two Fluorescent Probes for Recognition of Acetylcholinesterase: Design, Synthesis, and Comparative Evaluation
Source: MDPI journal article supplement (doi:10.3390/molecules29091961), 2024-04-25
Supplement: s1 [file s1]

## Supporting Material

### Two fluorescent probes for recognition of acetylcholinesterase: design, synthesis, and comparative evaluation

Xia Lin<sup>1,2,3</sup>, Qingyuan Yi<sup>1</sup>, Binyang Qing<sup>4</sup>, Weisen Lan<sup>1</sup>, Fangcheng Jiang<sup>5</sup>, Zefeng Lai<sup>5</sup>, Jijun Huang<sup>6</sup>, Qing Liu<sup>6</sup>, Jimin Jiang<sup>6</sup>, Mian Wang<sup>4</sup>, Lianjia Zou<sup>2</sup>, Xinbi Huang<sup>2</sup>, \* and Jianyi Wang<sup>1,3,\*</sup>

<sup>1</sup>Guangxi Key Laboratory of Special Biomedicine, Medical College, Guangxi University, Nanning, 530004, China

<sup>2</sup>Faculty of Pharmacy, Guangxi Health Science College, Nanning, 530023, China

<sup>3</sup>School of Chemistry and Chemical Engineering, Guangxi University, Nanning, 530004, China

<sup>4</sup>College of Life Science and Technology, Guangxi University, Nanning, 530004, China

<sup>5</sup>Pharmaceutical College, Guangxi Medical University, Nanning, 530021, China

<sup>6</sup>Guangxi Zhuang Autonomous Region Drug Administration, Nanning 530029, China

\*Corresponding authors: huangxinbi333@163.com(X. Huang); jianyiwang@gxu.edu.cn(J. Wang)

#### 1 Synthetic route

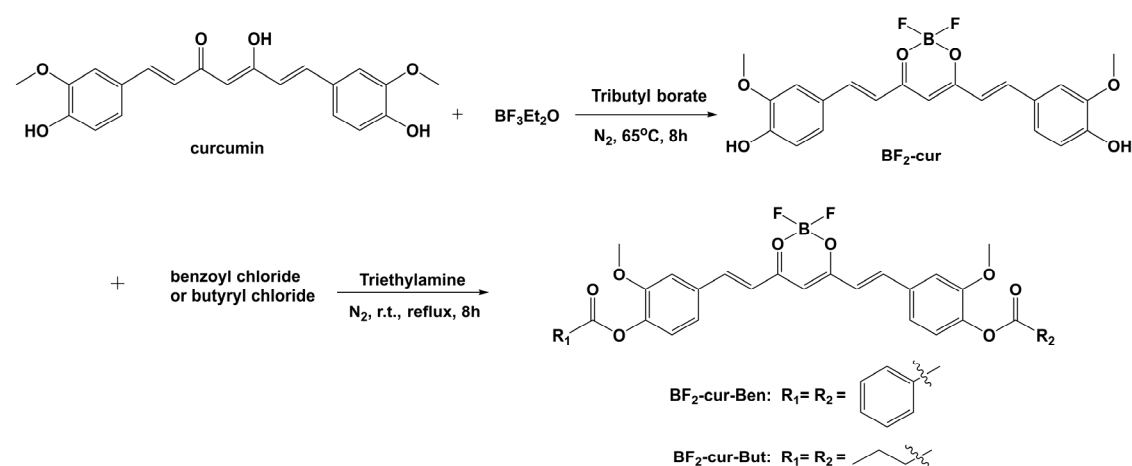

**Scheme S1** Synthetic route of  $\text{BF}_2\text{-cur-Ben}$  and  $\text{BF}_2\text{-cur-But}$ .

## 2 Response and detection of the probes on AChE *In vitro*

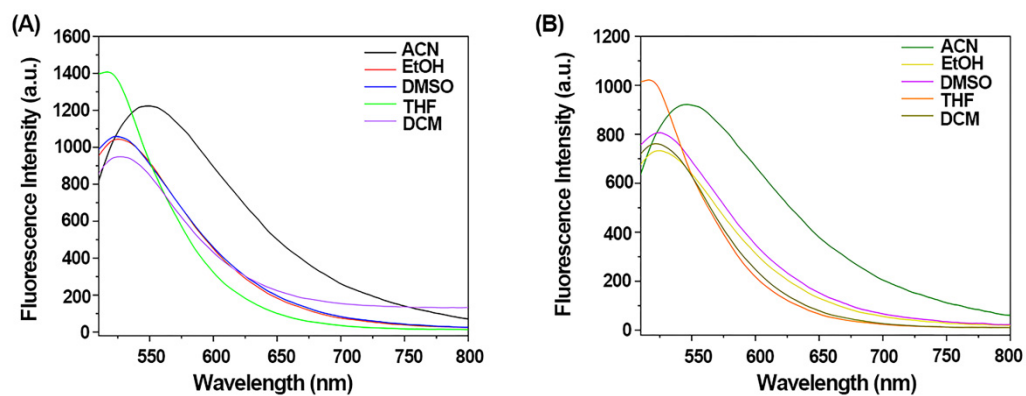

**Figure S1.** Fluorescence emission of BF<sub>2</sub>-cur-Ben (A) and BF<sub>2</sub>-cur-But (B) under different solvent conditions.

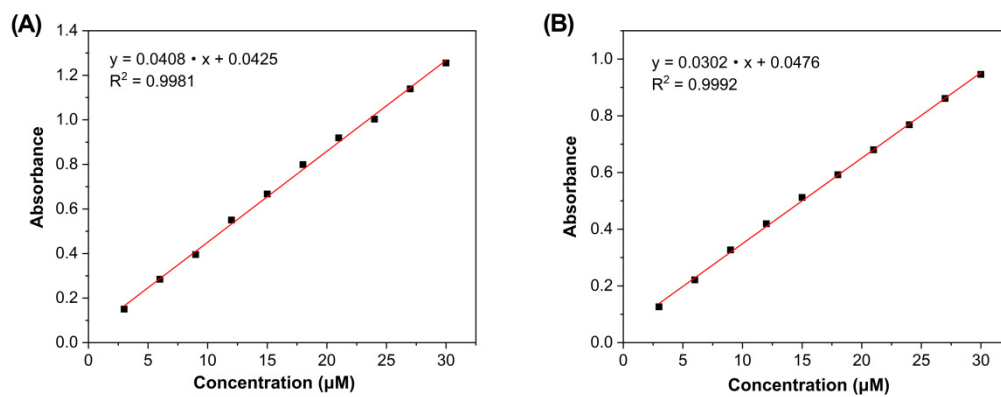

**Figure S2.** Lambert-Beer plot of BF<sub>2</sub>-cur-Ben (A) and BF<sub>2</sub>-cur-But (B).

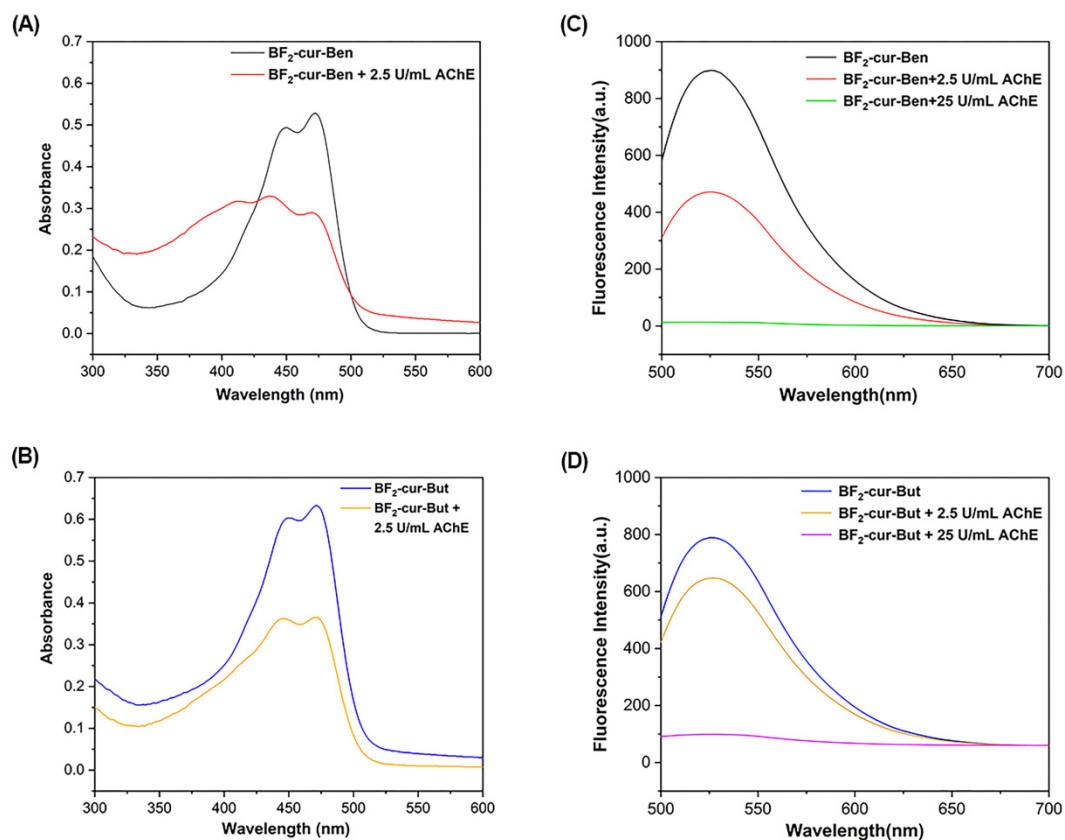

**Figure S3.** UV absorption (A)(B) and fluorescence spectra (C)(D) of BF<sub>2</sub>-cur-Ben and BF<sub>2</sub>-cur-But to AChE. The probes: 5  $\mu$ M, AChE: 2.5 U/mL, Solvent: DMSO / PBS = 5 / 95 (V/V), pH = 7.4, incubation conditions: 37  $^{\circ}$ C, 60/20 min,  $\lambda_{\text{ex}}$  /  $\lambda_{\text{em}}$  = 476 nm / 533 nm, error bars are  $\pm$  SD (n=3).

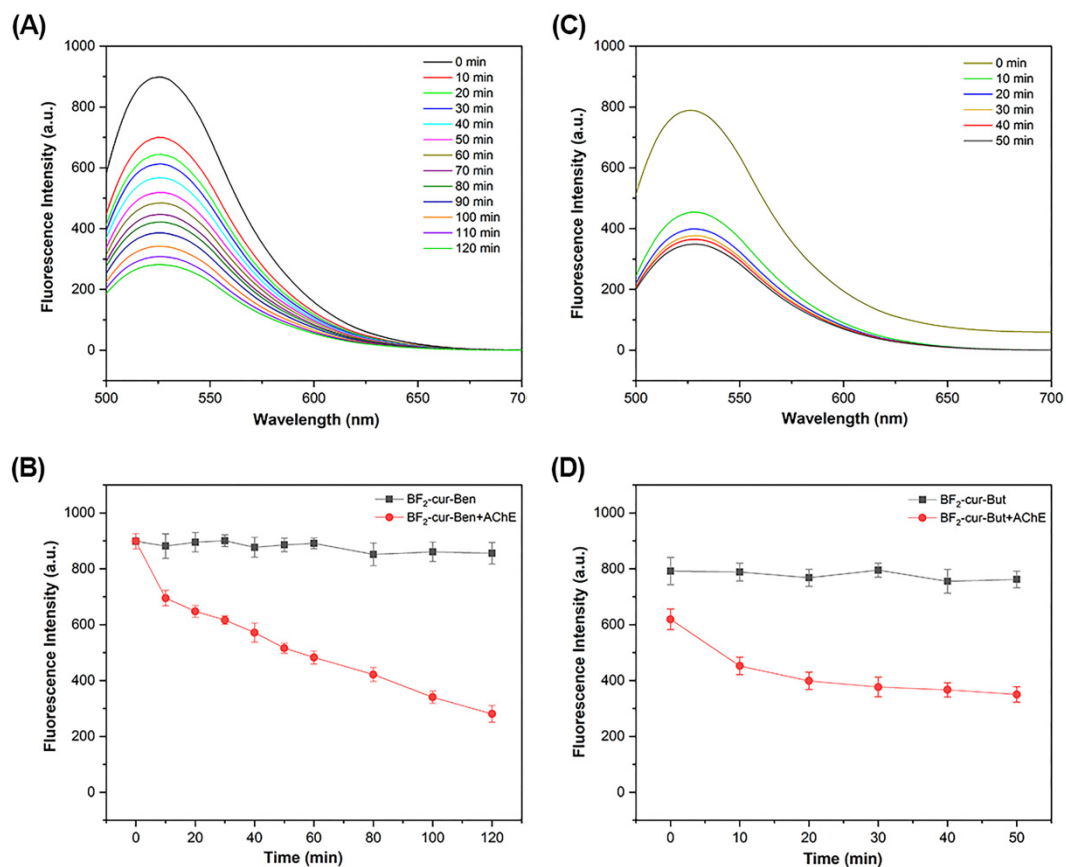

**Figure S4.** Fluorescence changes with incubation time for BF<sub>2</sub>-cur-Ben (A) (B) and BF<sub>2</sub>-cur-But (C) (D). The probes: 5  $\mu$ M, AChE: 2.5 U/mL, solvent: DMSO / PBS = 5 / 95 (V/V), pH = 7.4, incubation conditions: 37  $^{\circ}$ C, 0-120/50 min,  $\lambda_{\text{ex}}$  /  $\lambda_{\text{em}}$  = 476 nm / 533 nm, error bars are  $\pm$  SD (n=3).

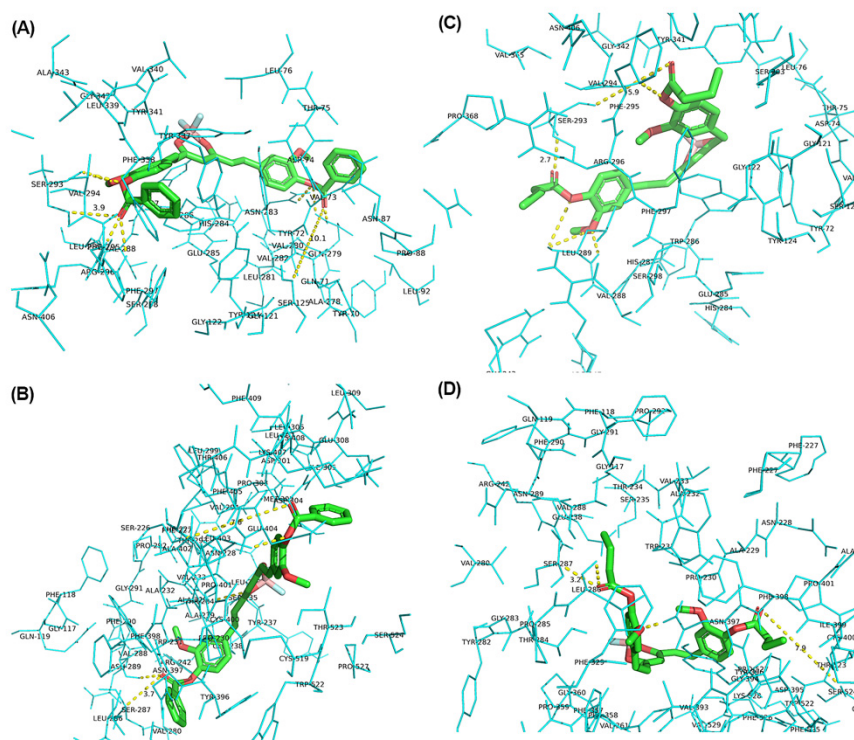

**Figure S5.** Molecular docking of BF<sub>2</sub>-cur-Ben to AChE(A) and BChE(B), and BF<sub>2</sub>-cur-But to AChE(C) and BChE(D).

**Table S1** Results of molecular docking studies of the 2 probes with AChE and BChE

|                          |      | shortest distance for Ser | hydrogen |
|--------------------------|------|---------------------------|----------|
|                          |      | pro-nuclear offense       | bonds    |
| BF <sub>2</sub> -cur-Ben | AChE | Ser-293:3.9 Å             | 7        |
|                          | BChE | Ser-287:3.9 Å             | 3        |
| BF <sub>2</sub> -cur-But | AChE | Ser-293:2.7 Å             | 4        |
|                          | BChE | Ser-287:3.2 Å             | 2        |

### 3 Safety Evaluation of the probes

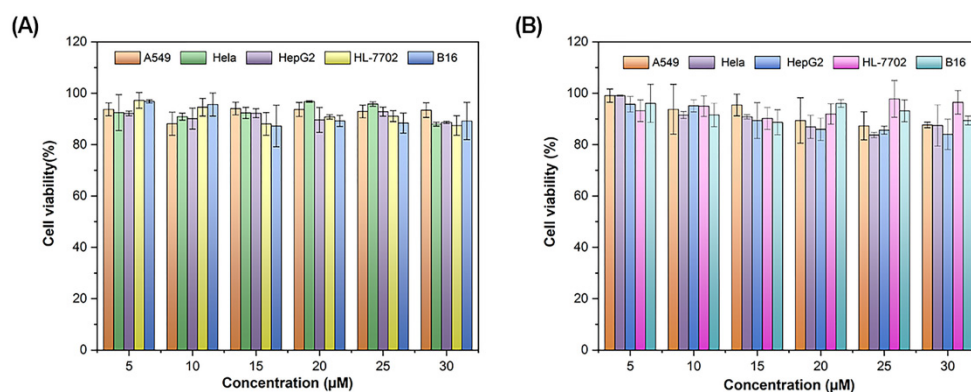

**Figure S6.** Cell survival of A549, Hela, HepG2, HL-7702 and B16 cells at different probe concentrations for BF<sub>2</sub>-cur-Ben (A) and BF<sub>2</sub>-cur-But (B).

### 4 <sup>1</sup>H NMR spectra of the compounds

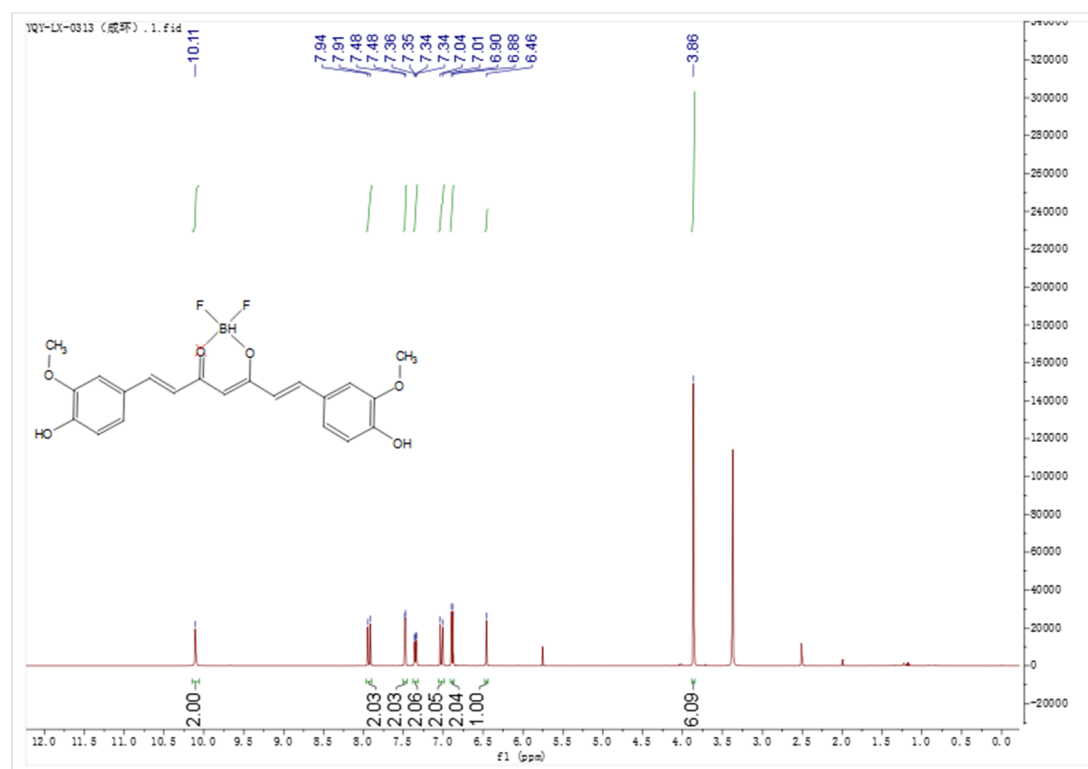

**Figure S7.** <sup>1</sup>H NMR spectrum of BF<sub>2</sub>-cur in DMSO-*d*<sub>6</sub>.



#### 4 $^{13}\text{C}$ NMR spectra of the compounds

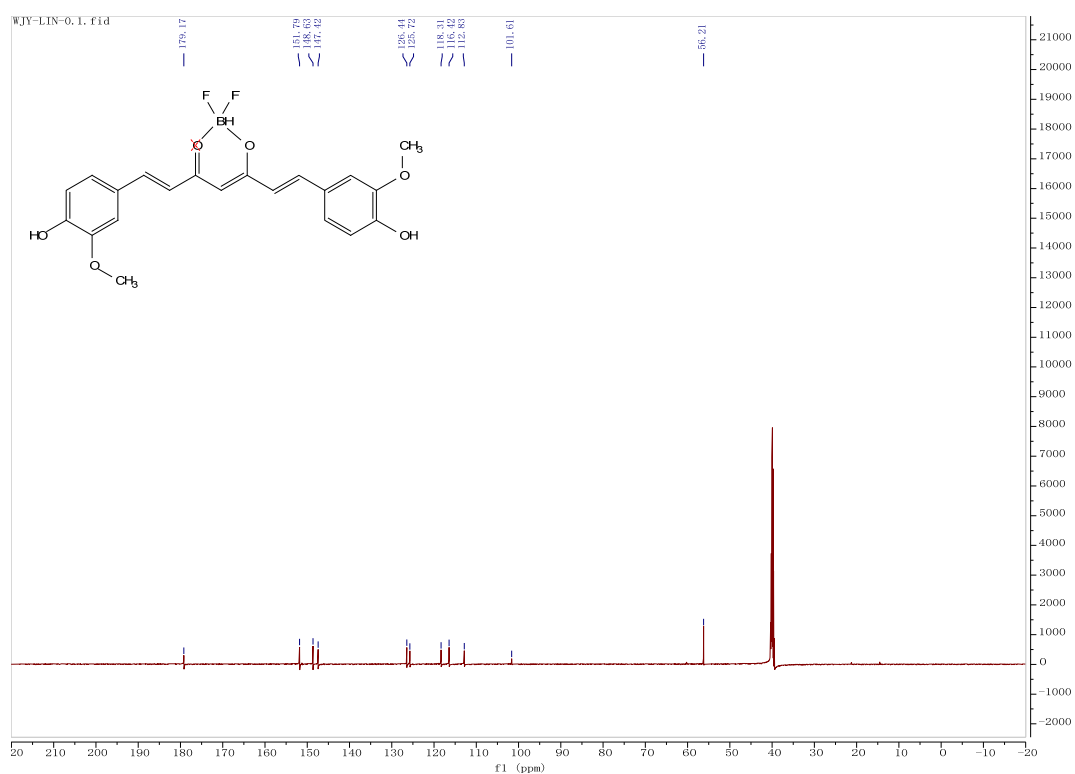

**Figure S10.**  $^{13}\text{C}$  NMR spectrum of BF<sub>2</sub>-cur in DMSO-*d*<sub>6</sub>.

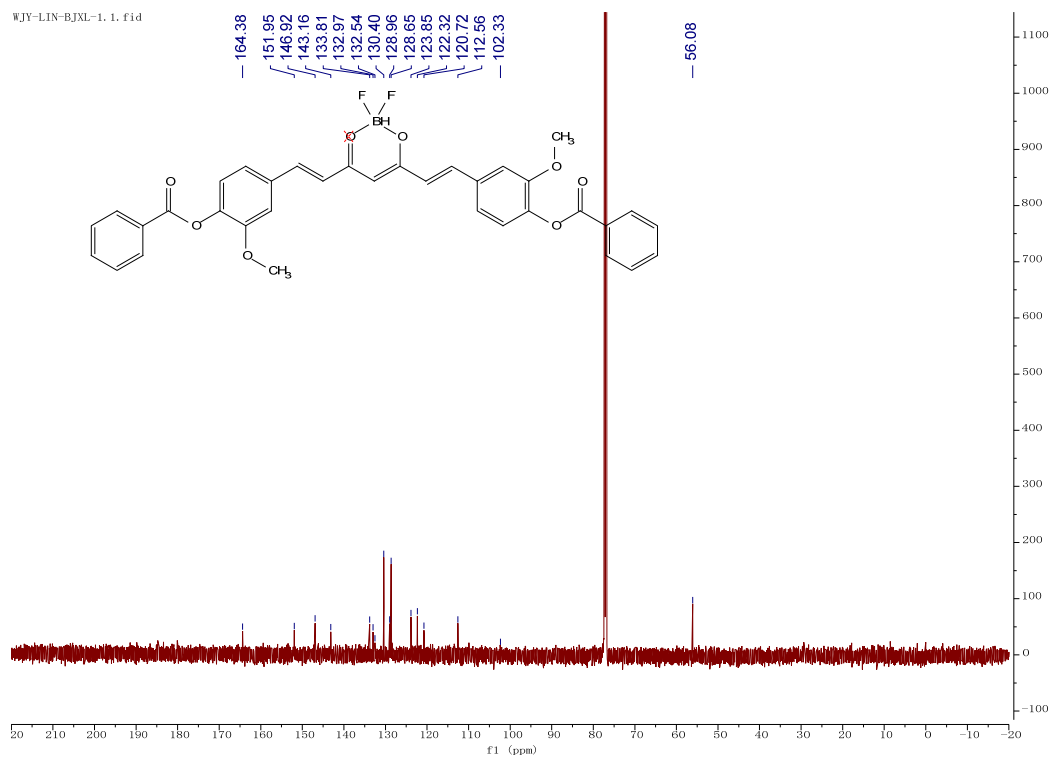

**Figure S11.**  $^{13}\text{C}$  NMR spectrum of BF<sub>2</sub>-cur-Ben in Chloroform-*d*.



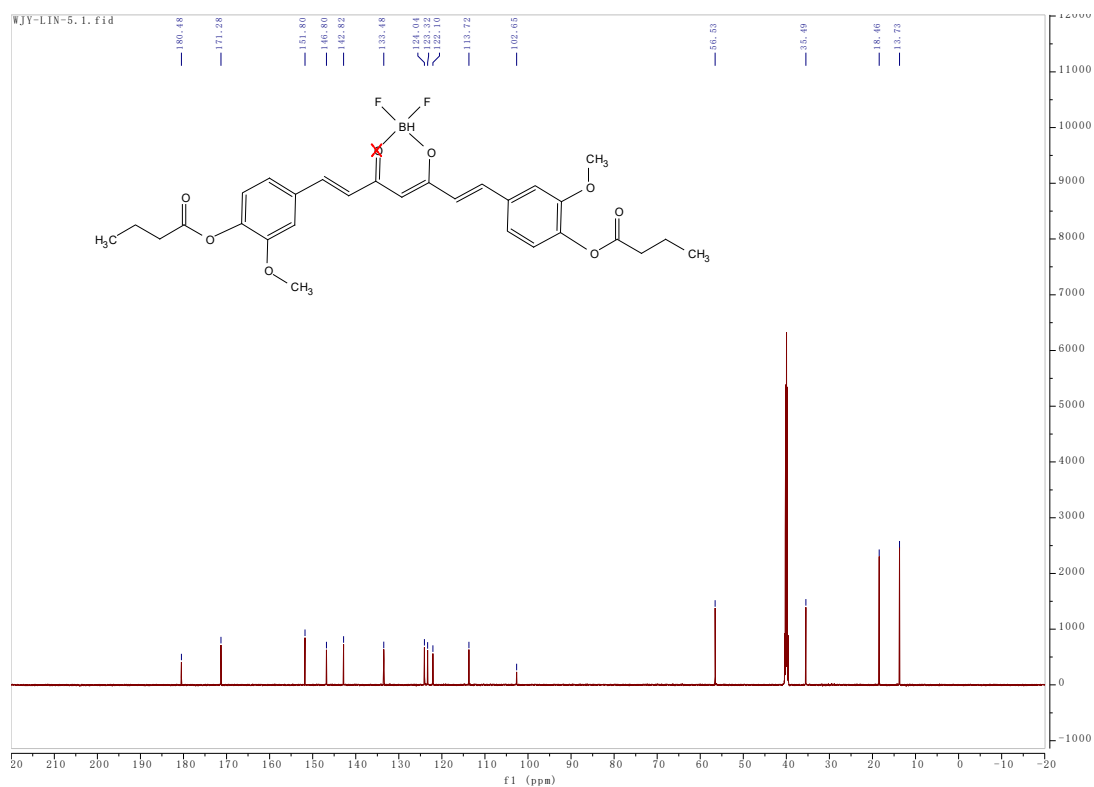

**Figure S12.** <sup>13</sup>C NMR spectrum of BF<sub>2</sub>-cur-But in DMSO-*d*<sub>6</sub>.

## 5 ESI-MS spectra of the compounds

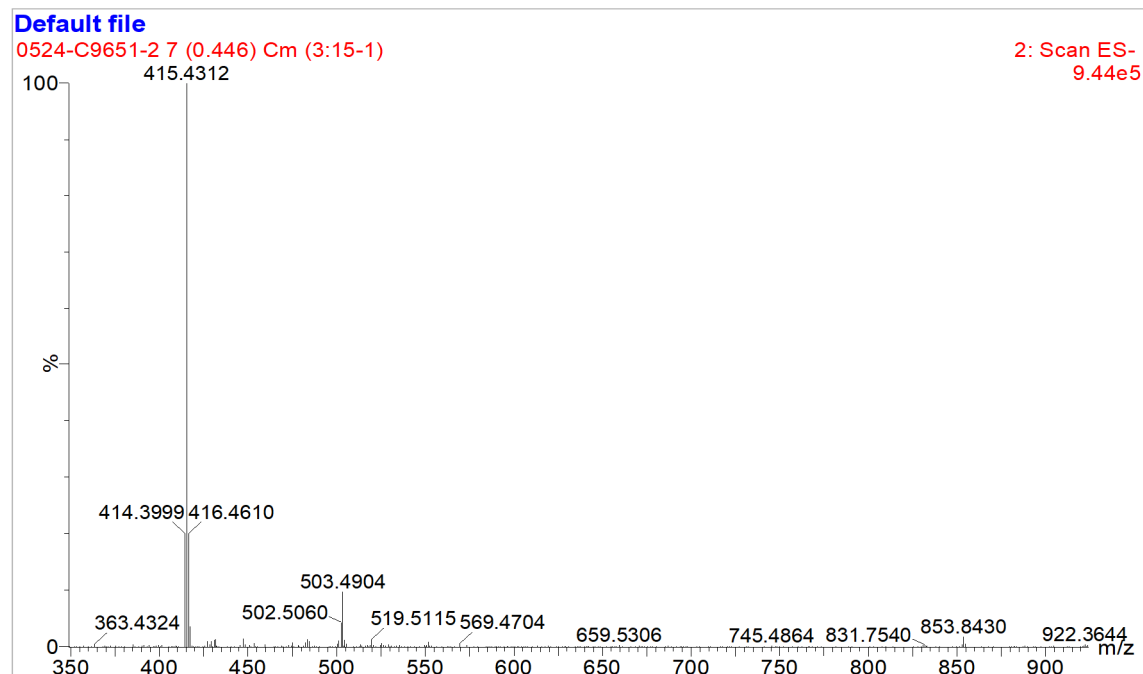

**Figure S13.** ESI-HRMS spectrum of BF<sub>2</sub>-cur.

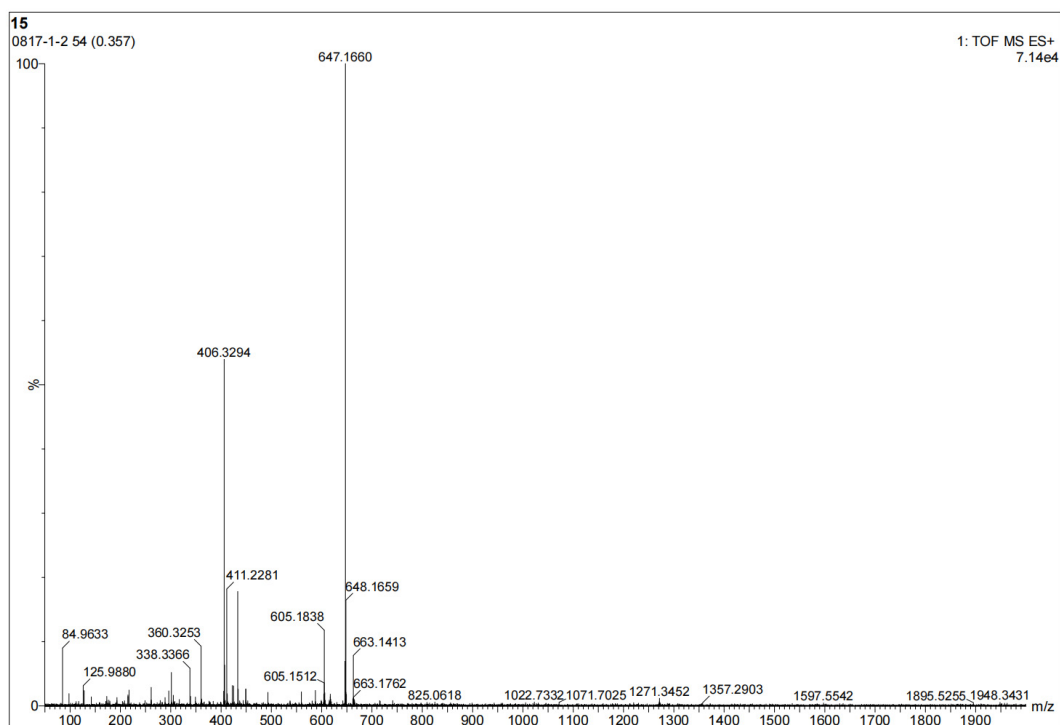

**Figure S14.** ESI-MS spectrum of BF<sub>2</sub>-cur-Ben.

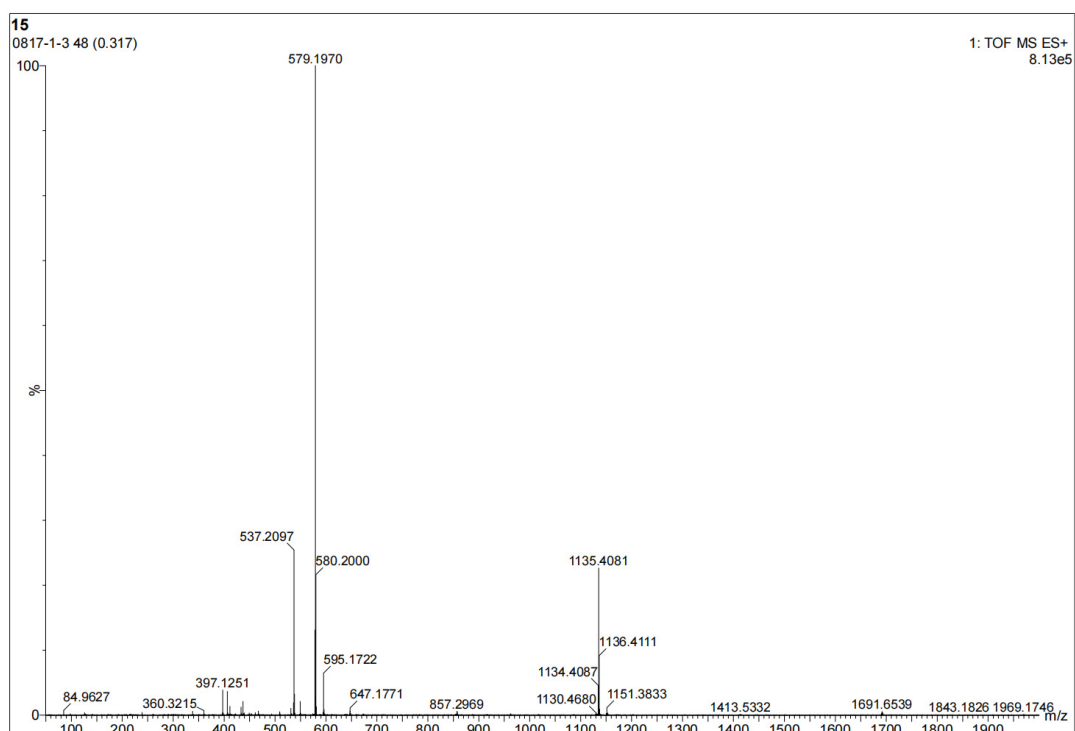

**Figure S15.** ESI-MS spectrum of BF<sub>2</sub>-cur-But.
